# Supplementary material for: An Optimal Operation Model for Hydropower Stations Considering Inflow Forecasts with Different Lead-Times
Source: Springer Nature journal article supplement (doi:10.1007/s11269-018-2095-1), 2018-09-18
Supplement: 11269_2018_2095_MOESM1_ESM.pdf [file 11269_2018_2095_MOESM1_ESM.pdf]

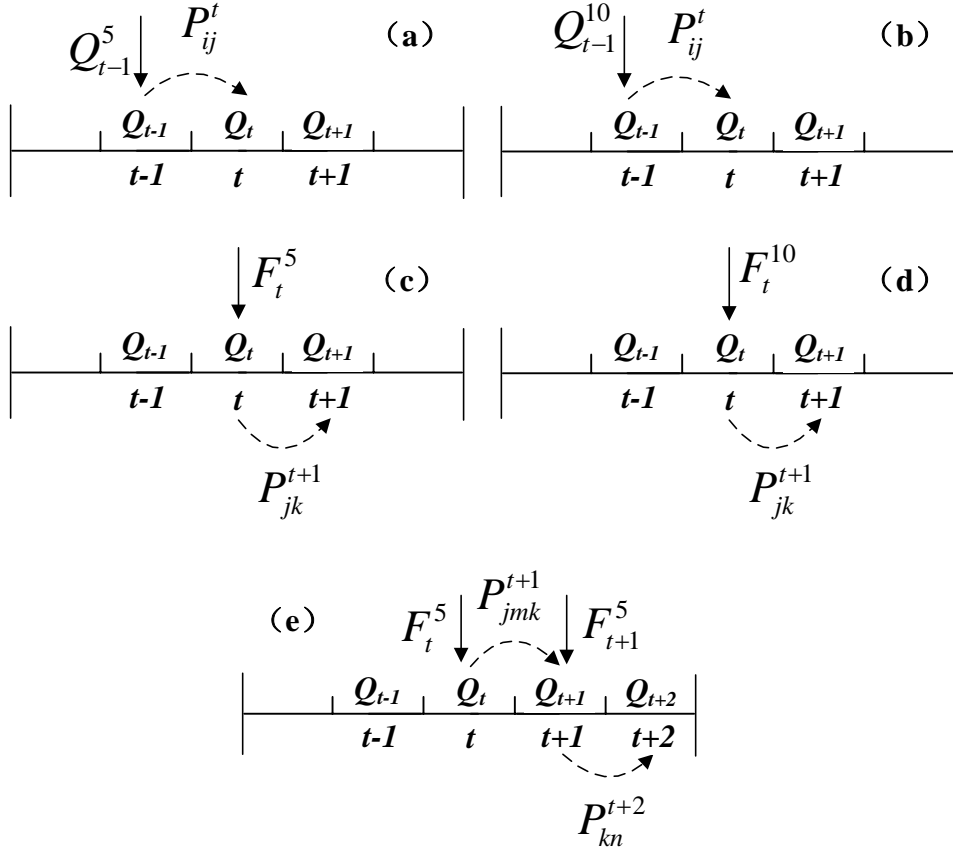

**Fig. S1** Description of inflow processes in various models. (a) and (b) SDP- $Q_{t-1}$ , (c) and (d) SDP-  $Q_t$ , (e) TS-BSDP.
