# Supplementary material for: An Optimal Operation Model for Hydropower Stations Considering Inflow Forecasts with Different Lead-Times
Source: Springer Nature journal article supplement (doi:10.1007/s11269-018-2095-1), 2018-09-18
Supplement: 11269_2018_2095_MOESM2_ESM.pdf [file 11269_2018_2095_MOESM2_ESM.pdf]

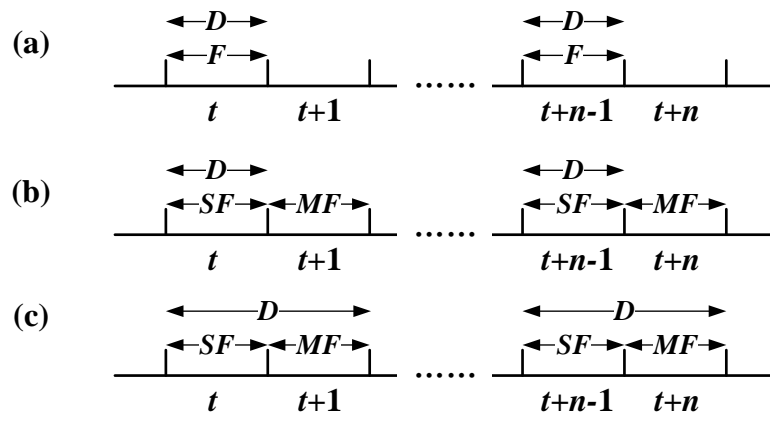

**Fig. S2** The decision-making strategies for different models. (a) for SDP- $Q_t$ , (b) and (c) for TS-BSDP.
